# Supplementary material
Source: publisher site journal article supplement (https://www.dovepress.com/article/282992)
Supplement: Supplementary file 1 [file get_supplementary_file.php]

## Supplementary Figures

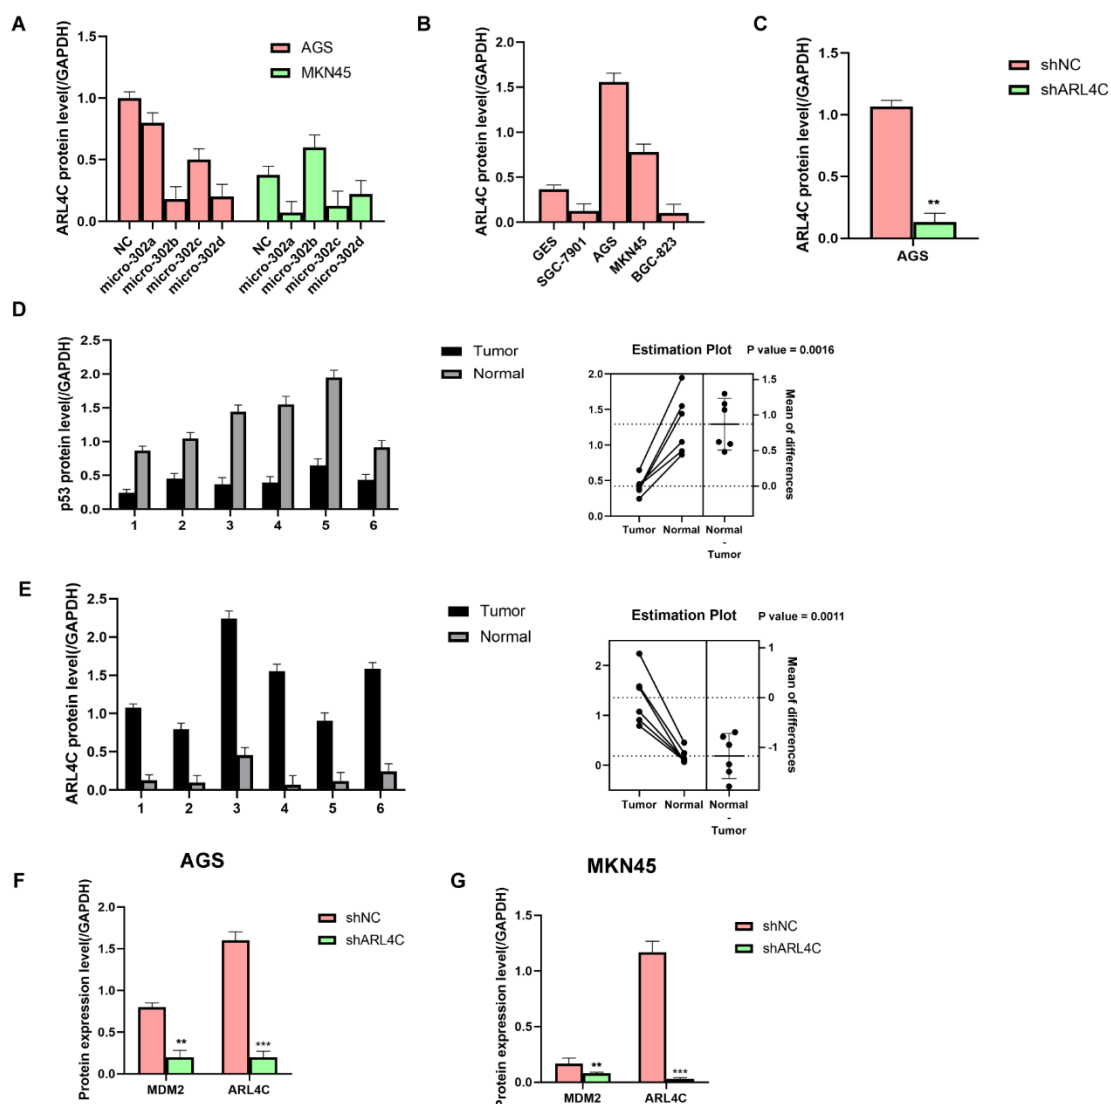

**Supplementary Figure 1** (A) Relative protein levels (ARL4C/GAPDH) in Figure 2C. (B) Relative protein levels (ARL4C/GAPDH) in Figure 3A. (C) Relative protein levels (ARL4C/GAPDH) in Figure 3B. (D) Relative protein levels (p53/GAPDH) in Figure 5C. (E) Relative protein levels (ARL4C/GAPDH) in Figure 5C. (F and G) Relative protein levels of MDM2 and ARL4C in Figure 5F. All western blot images were quantified by ImageJ. \*\*P < 0.01, \*\*\*P < 0.001.

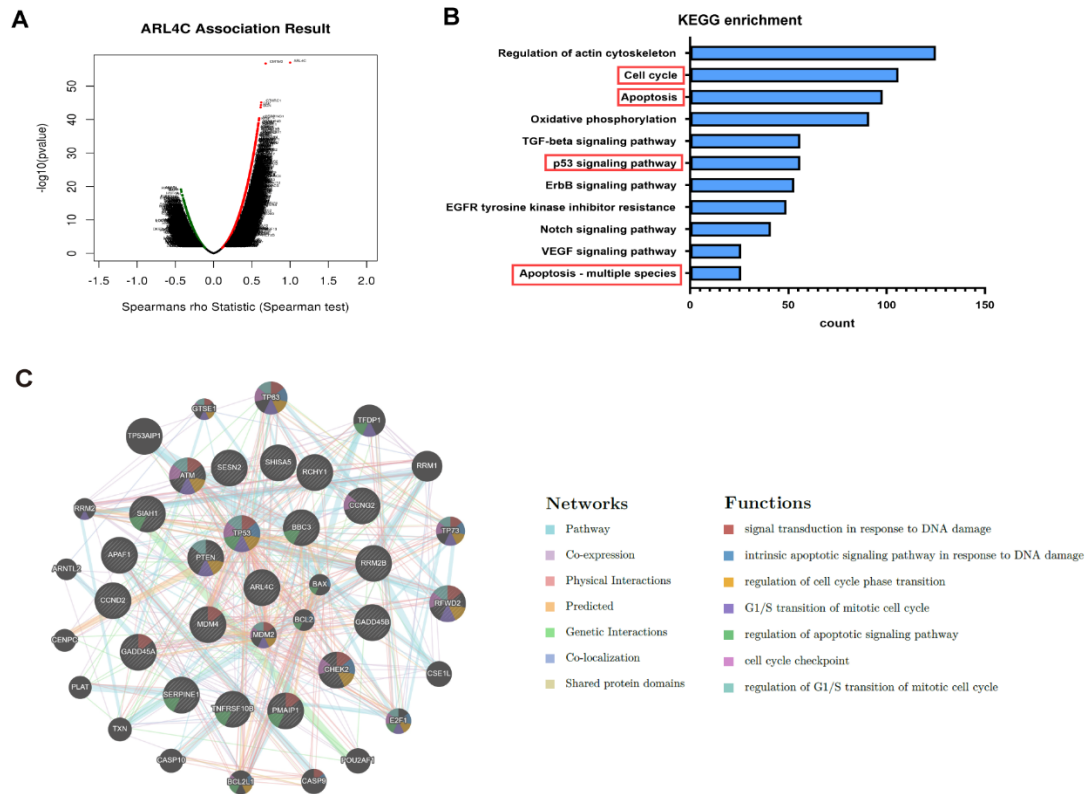

**Supplementary Figure 2 (A)** The volcano plot showed all ARL4C-related genes in TCGA STAD datasets (Spearman correlation analysis). **(B)** KEGG enrichment analysis indicated that ARL4C was associated with p53 signaling. **(C)** A gene-gene interaction network between ARL4C and genes in p53 signaling (RNA-seq). Each node represented a gene. The inter-node connection lines represented the types of gene-gene interactions. The node colors represented the potential functions of respective genes.
